## Flowering as metamorphosis: two sequential signals regulate floral initiation in *Lolium temulentum*

Carl N. McDaniel\* and Laura K. Hartnett

Department of Biology, Rensselaer Polytechnic Institute, 110 8th Street, Troy, NY 12180-3590, USA

\*Author for correspondence (e-mail: mcdanc@rpi.edu)

### SUMMARY

We investigated floral initiation in the long-day monocot *Lolium temulentum*, strain Ceres, by culturing apices explanted from photoperiodically induced plants at various times after one inductive long day onto medium with, and without, gibberellin. Apices cultured on the first day after the inductive long day usually required gibberellin in the medium to initiate floral morphogenesis while apices explanted on the second day after induction did not require gibberellin. Apices explanted on the first day after induction onto medium without gibberellin grew vegetatively for many days but a several-day exposure to culture medium with gibberellin at any time caused most apices to initiate floral morphogenesis. The gibberellin synthesis inhibitor, ancymidol, when applied to plants before apex excision and when present in the culture medium reduced floral initiation by more than 50% in the absence of added

gibberellin in the medium, but it was ineffective in the presence of gibberellin. These results indicated that floral initiation in photoperiodically induced plants resulted from two signals acting at the apex. The first signal induced the apex into a florally determined state and then the second signal, gibberellin, elicited expression of the florally determined state. Leaf removal and culture of apices from plants previously treated with gibberellin provided evidence that the leaf-applied gibberellin did not itself act on the apex to cause floral determination or initiation. Rather, the exogenous gibberellin appeared to stimulate the production of a signal in the leaves that then led to floral initiation.

Key words: floral determination, flowering, gibberellin, *Lolium temulentum*

### INTRODUCTION

Forty years ago Lang (1957) demonstrated that gibberellin (GA), when applied to the leaves, led to flowering in several biennial and long-day (LD) plants. This observation has been extended to many LD plants, including *Lolium temulentum*, although many LD plants, as well as other flowering types, do not flower in response to applied GA (Evans, 1964; Lang, 1965; Zeevaart, 1983; Pharis and King, 1985). In several of the responsive plants, including *L. temulentum*, a transient rise in endogenous GAs has been observed following an inductive photoperiod (Jones and Zeevaart, 1980; Metzger and Zeevaart, 1980; Pharis et al., 1987) while application of GA inhibitors has reduced, stimulated, or had no effect on flowering depending upon many factors including when applied, photoperiodic response type, and species (Lang, 1965; Evans, 1969b; Zeevaart, 1983).

In LDs, application to short-day grown *L. temulentum* of an appropriate dose of GA to the leaves, or injection into the apex, causes all plants to initiate floral development (Evans, 1964, 1969b). Although many GAs are not as effective as a single LD in terms of the rate, and extent, of floral morphogenesis, more recent studies have identified highly florigenic GAs that elicit a response similar to that of a single LD (Evans et al., 1994). Evans (1969b) concluded that exogenous GAs do not play a role in floral evocation (i.e. induction of an apex into a

florally determined state) in *L. temulentum* while more recent studies have resurrected the possibility that GAs may play a role in floral evocation and, more certainly, a role in inflorescence and flower development (King et al., 1993).

We observed that most *L. temulentum* apices excised onto culture medium containing gibberellin A<sub>3</sub> (GA<sub>3</sub>) on the first day after one inductive LD, initiated floral morphogenesis while most of those placed on medium lacking GA<sub>3</sub> remained vegetative (McDaniel et al., 1991). If the excision was made on the second day after the LD, most apices initiated floral morphogenesis in the absence of GA<sub>3</sub>. We have analyzed this time-dependent GA<sub>3</sub> response and established that floral initiation in *L. temulentum* is a two-step process conceptually similar to that observed in metamorphosis of insects and amphibians where a hormonal signal elicits a pattern of morphogenesis unique for each part of the organism as a function of its previously determined fate (Slack, 1983). First, a photoperiodically induced leaf signal acts on the shoot apex (i.e. those tissues above the youngest expanding leaf primordium) to determine it for floral initiation. Then, GA elicits the expression of this florally determined state and the apex initiates inflorescence morphogenesis. In addition, we have analyzed the kinetics of floral initiation by leaf applied GA<sub>3</sub> and provide data consistent with the interpretation that the leaf applied GA<sub>3</sub> does not itself act on the apex to elicit inflorescence morphogenesis. Rather, like its role in *Bryophyllum*

*daigremontianum* (Zeevaart, 1969), leaf-applied GA appears to cause the leaves to send a signal that ultimately leads to the expression of inflorescence morphogenesis at the apex.

## MATERIALS AND METHODS

### Plants and growth conditions

Seeds of *Lolium temulentum* L., strain Ceres, were initially obtained from Lloyd Evans (Canberra, Australia). Plants were grown in short-day growth room conditions of 8 hour light and 16 hour dark periods, a day temperature of  $25\pm 1^\circ\text{C}$  and a night temperature that decreased to a low of  $18\pm 1^\circ\text{C}$ . Light was provided by sodium-vapor and metal-halide lamps with a photon flux density of  $400\text{--}500\ \mu\text{mole}/\text{m}^2/\text{sec}$  at soil level. Seeds were planted in standard 10 cm plastic pots, four seeds per pot, containing Metro-Mix 250 (Scotts, Marysville, OH). Plants were watered daily with tap water and fertilized weekly with Ra-pid-gro (23-19-17) (Ortho, San Ramon, CA).

### Photoperiodic induction and GA<sub>3</sub> application

At 7- to 8-weeks old, plants were exposed to a single LD by extending the 8 hour day to 24 hours with light from incandescent lamps with a photon flux density of  $50\ \mu\text{mole}/\text{m}^2/\text{sec}$  at soil level with a temperature that decreased to a low of  $18\pm 1^\circ\text{C}$  as during the regular night. Following Evans et al. (1990) the day during which the photoperiod is extended is designated Day I, with subsequent days being numbered II, III, etc., while the timing of responses in hours is taken from the beginning of the period of high irradiance on Day I.

GA<sub>3</sub> was dissolved in absolute ethanol and subsequently diluted with distilled water to the appropriate concentration. From 6-6.5 hours after the beginning of the light period, a single 10  $\mu\text{l}$  drop containing 50  $\mu\text{g}$  of GA<sub>3</sub> was applied to the uppermost expanded leaf about 2 cm from the ligule such that the drop did not roll off the leaf or into the ligule. In leaf removal experiments, GA<sub>3</sub> was applied to the leaf below the uppermost expanded leaf. As did Pharis et al. (1987), we identified this concentration as optimal, and the time as one of high sensitivity.

### Shoot apex culture and floral score

Apices from 7- to 8-week-old plants were excised and cultured as previously described (McDaniel et al., 1991). Briefly, apices (all initiated leaf primordia and tissues above the first upwardly growing leaf primordium) with the smallest over-arching leaf primordium left intact, or trimmed to 2-3 mm in length, were placed on about 1.5 ml of Linsmaier and Skoog medium (1965) at pH 5.5 with 0.7% agar, 5% sucrose and hormones, as indicated, in a 24-well culture plate. GA<sub>3</sub> medium contained  $1.0\times 10^{-6}$  M GA<sub>3</sub> and kinetin medium contained  $5\times 10^{-7}$  M kinetin, while hormone-free medium lacked hormone additions. Filter-sterilized GA<sub>3</sub> was added after autoclaving while kinetin was added prior to autoclaving. Culture plates were sealed with Parafilm wrap and placed in a  $25\pm 1^\circ\text{C}$  incubator with 8 hour light and 16 hour dark periods. Cool white fluorescent bulbs provided a photon flux density of  $70\ \mu\text{mole}/\text{m}^2/\text{sec}$  at plate level. For most experiments cultured apices were dissected after 21 days in culture and designated with scores of 0, vegetative; 1, shoot apex elongated; 2, double ridges; 3, advanced double ridges; 4, glume primordia; 5, lemma primordia; 6, floret primordia; 8, anthers present. A score of 2 indicated an apex was floral (Evans, 1969a). Floral scores in tables and figures were based on the most advanced spikelet in an inflorescence which in all cases, except some apices from GA<sub>3</sub> treated plants, was the terminal spikelet. When apices were transferred to fresh, or different, medium during the culture period, the expanded basal leaves were trimmed to 3-4 mm in length and the base of the explant was trimmed if callused or necrotic.

### Ancymidol treatment

Ancymidol was dissolved in methanol (0.01 M) and the stock diluted

with water for each experiment. 7-week-old plants were watered exclusively for 6 days prior to induction and on Day I with a solution containing 20 mg/l ancymidol. In addition, plants were sprayed at the beginning, and the end, of the light period with the same solution until run-off from the leaves occurred, for the same 7-day period and on Day II. 48-52 hours after the beginning of the inductive LD, apices were excised onto medium containing kinetin and ancymidol (5 mg/l), or GA<sub>3</sub> and ancymidol. Apices from other untreated plants from the same population of plants were excised 48-52 hours after the beginning of the inductive period and placed on kinetin, or GA<sub>3</sub>, medium. Apices on kinetin-ancymidol medium were transferred to fresh medium after 10 and 20 days. After 21 days, all apices on kinetin, GA<sub>3</sub> and GA<sub>3</sub>-ancymidol media were dissected. Some apices on kinetin-ancymidol medium were dissected at 21 days while most were transferred a third time at 30 days onto either kinetin-ancymidol, or GA<sub>3</sub>-ancymidol, medium and dissected after 20 days.

### Leaf removal

Fully expanded leaves were removed by cutting the leaf sheath just below the ligule. When all leaves, or all leaves but the GA<sub>3</sub> treated leaf, were removed, the apical leaf blades were removed by cutting the plant just below the ligule of the uppermost expanded leaf. For night leaf removals, plants were removed from the dark growth room into very dim fluorescent light, leaves removed, and plants returned to the dark.

### Biological variation

Growth conditions, plant age and other poorly characterized factors influence the floral response of *L. temulentum* (Evans, 1969a; Evans and King, 1985). Even under apparently uniform growth and culture conditions, we have observed considerable biological variability in the flowering response in vitro of *L. temulentum* in our laboratory (e.g. Table 1, Results Section). As a consequence, each experiment had internal control groups of plants, and comparisons of floral responses were made within a population of plants grown, and manipulated, at the same time. Table and figure legends give experiment numbers. For each experiment, except for the plant age experiment (Fig. 6), all of the plants, or apices, were taken from the same population of plants. For each experiment from 4 to 24 plants were in each of the following control groups, as appropriate: maintained under short-day conditions for 21 days and dissected (were always vegetative), induced and returned to short-day conditions for 21 days and then dissected (were always floral), apices from short-day grown plants excised and cultured on GA<sub>3</sub> medium for 21 days and then dissected (were always vegetative), and apices from induced plants excised and cultured on kinetin or GA<sub>3</sub> medium for 21 days and then dissected (response depended upon medium and time of excision).

## RESULTS

### Inflorescence development following LD induction

21 days after a single LD induction, apices on intact plants formed inflorescences with about 20 spikelets all of which had florets at, or beyond, stage 8. A hint of a gradient may be observed with the terminal and more apical spikelets being slightly more advanced than the most basal spikelets. As we reported (McDaniel et al., 1991), apices cultured onto GA<sub>3</sub> medium formed near normal inflorescences. A marked developmental gradient, however, was observed with the terminal and apical spikelets being more advanced and the basal most spikelet primordia appearing vegetative or at double ridges, stage 2. A more pronounced gradient as well as other subtle morphological variations were observed when apices were from plants that had been given marginal inductive conditions

**Table 1. Variability in time-dependent, gibberellin-dependent flowering of cultured apices of *Lolium temulentum*, strain Ceres**

| Time cultured (Hours after beginning of long day) | Medium*         | % Floral±s.d. (range) (n)† | Floral score±s.d. for floral apices (range) (n) |
|---------------------------------------------------|-----------------|----------------------------|-------------------------------------------------|
| 32-36                                             | Kinetin         | 35±28 (0-90) (22)          | 4.9±0.3 (4.3-5.3) (19)                          |
| 32-36                                             | GA <sub>3</sub> | 88±15 (57-100) (19)        | 5.8±0.6 (4.3-6.8) (19)                          |
| 47-51                                             | Kinetin         | 67±24 (38-100) (9)         | 5.2±0.3 (4.5-5.6) (9)                           |
| 47-51                                             | GA <sub>3</sub> | 99±2 (94-100) (8)          | 6.7±0.6 (5.7-7.4) (8)                           |

\*Average survival on GA<sub>3</sub> medium was 89% and on kinetin medium 85%.  
 †Range is the average for all apices in an experiment and n is the number of experiments evaluated.

or apices were cultured on medium lacking GA<sub>3</sub>. Although apices grew and initiated inflorescences on hormone-free medium, survival was generally substantially less than on kinetin or GA media. For this reason, apices were cultured onto kinetin or GA medium except where noted.

**Time-dependent gibberellin response**

More than a thousand apices from short-day-grown plants have been excised and cultured on GA<sub>3</sub> medium. None has ever flowered in culture. When apices from induced plants were explanted between 32 and 36 hours after the beginning of the inductive LD onto medium containing kinetin, most did not flower, while when excised onto GA<sub>3</sub>-containing medium, most did flower (Table 1, Fig. 1). When the apices were explanted 47-51 hours after the beginning of the inductive LD, most of the apices flowered although more flowered on GA<sub>3</sub> than on kinetin medium. Apices cultured on hormone-free medium gained the capacity to flower in culture several days after the beginning of the LD.

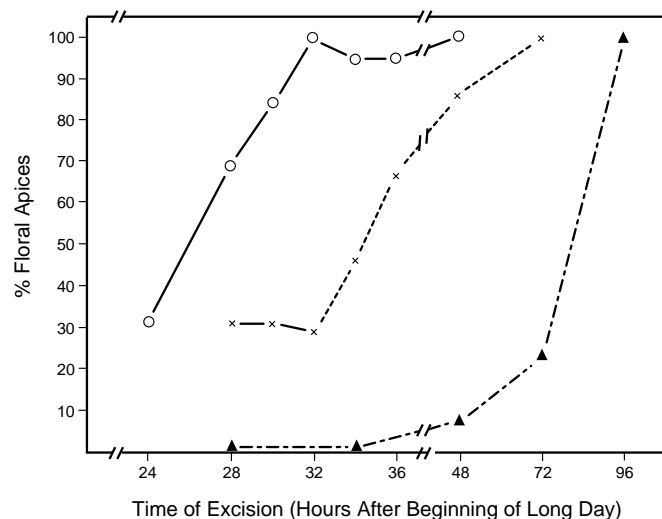

**Fig. 1.** Percentage of *L. temulentum* apices explanted from long-day induced plants that flowered in culture as a function of excision time and culture medium. Apices cultured onto GA<sub>3</sub> medium: O—O, 24 apices per time point, 75-100% survival, experiment #123. Apices cultured onto kinetin medium: x—x, 18 apices per time point, 78-89% survival, experiment #121. Apices cultured onto hormone-free medium: ▲—▲, 34 apices per time point, 65-92% survival, experiment no. 124.

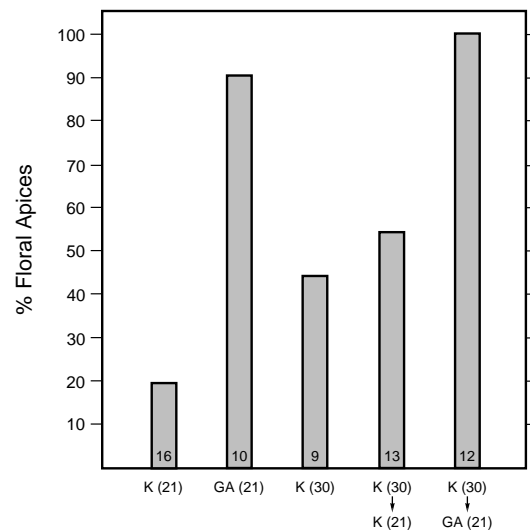

**Fig. 2.** Percentage of *L. temulentum* apices explanted from long-day induced plants that flowered in culture as a function of culture medium and time in culture. All apices explanted between 32 and 36 hours after the beginning of the long day. K, kinetin medium; GA, GA<sub>3</sub> medium. Numbers in parentheses are the number of days on the culture medium before final transfer or before dissection. Apices on kinetin medium for 30 days were transferred to fresh kinetin medium at 10 and 20 days. Arrow denotes final transfer. Numbers in histogram bars are the number of surviving apices. Experiment no. 91.

Interestingly, when apices were excised between 32 and 36 hours after the beginning of the inductive LD onto kinetin medium and then, after several to many days, transferred to a medium containing GA<sub>3</sub>, the percentage that was floral was the same as if apices were initially cultured onto GA<sub>3</sub> medium (Fig. 2). Although explanted apices continue to grow in culture, the most rapid leaf initiation occurred in the first 20 days of culture, even when subcultured every 10 days. Usually, most apices that were explanted at about hour 34 and subcultured at 10 and 20 days onto kinetin medium grew vegetatively for 30 days and initiated, on average, eight new leaf primordia and expanded six existing primordia (Fig. 3). When transferred to GA<sub>3</sub> medium after the initial 30 day culture period, the upper eight spikelets of an inflorescence were produced by the cellular descendants of the shoot apical meristem present at the time of explanting (i.e. the cells above the youngest leaf primordium).

Although Fig. 1 showed a higher percentage floral apices at a given time for apices cultured on kinetin when compared to apices cultured on hormone-free medium, transfer experiments indicated that the enhanced flowering response was unique to GA<sub>3</sub> and was not seen in apices transferred onto kinetin- or IAA-containing medium (Table 2). Transferring apices onto kinetin medium after being cultured on hormone-free medium did not enhance the percentage that was floral over apices transferred onto hormone-free medium. In contrast, transferring onto GA<sub>3</sub> medium from hormone-free medium substantially increased the percentage of apices that were floral. Likewise, transferring onto IAA medium from kinetin medium did not change the percentage that was floral while transfer onto GA<sub>3</sub> medium did increase the percentage that was floral.

Apices needed to be on GA<sub>3</sub>-containing medium for about

**Table 2. Elicitation of floral initiation by gibberellin in *Lolium temulentum*, strain Ceres, apices cultured 32-34 hours after beginning of the long day induction**

| Experiment no. | 1st culture medium (20 or 21 days) | 2nd culture medium (20 or 21 days) | % floral (n) | Floral score for floral apices |
|----------------|------------------------------------|------------------------------------|--------------|--------------------------------|
| 127            | hormone-free                       | —                                  | 0 (11)       | —                              |
|                | Kinetin                            | —                                  | 10 (10)      | 5.0                            |
|                | GA <sub>3</sub>                    | —                                  | 64 (11)      | 5.7±0.5                        |
|                | hormone-free                       | hormone-free                       | 15 (13)      | 5.0                            |
|                | hormone-free                       | Kinetin                            | 12 (17)      | 5.0                            |
| 96A            | hormone-free                       | GA <sub>3</sub>                    | 45 (11)      | 4.8±1.6                        |
|                | Kinetin                            | —                                  | 50 (12)      | 5.0                            |
|                | GA <sub>3</sub>                    | —                                  | 100 (4)      | 7.5±1.0                        |
|                | Kinetin                            | IAA                                | 50 (6)*      | 4.0±1.7                        |
|                | Kinetin                            | GA <sub>3</sub>                    | 89 (9)       | 5.6±0.5                        |

\*Many apices placed, or transferred, onto IAA ( $1 \times 10^{-7}$  M) containing medium died. In this experiment, 36 apices were initially cultured and 6 (17%) survived.

2-4 days in order to exhibit an enhanced floral response whether they were exposed to GA<sub>3</sub> at the beginning of the culture period or after being first on kinetin medium for some period of days (Fig. 4). In the two experiments depicted in Fig. 4 about 80% of the excised apices flowered when placed directly on GA<sub>3</sub> medium. If apices were placed directly on GA<sub>3</sub> medium, they had to be on the medium for about 4 days before 80% flowered after being returned to kinetin medium. Likewise, when cultured first on kinetin medium and then transferred onto GA<sub>3</sub> medium, they had to be on GA<sub>3</sub> medium for about 2 days before 80% flowered after being returned to kinetin medium.

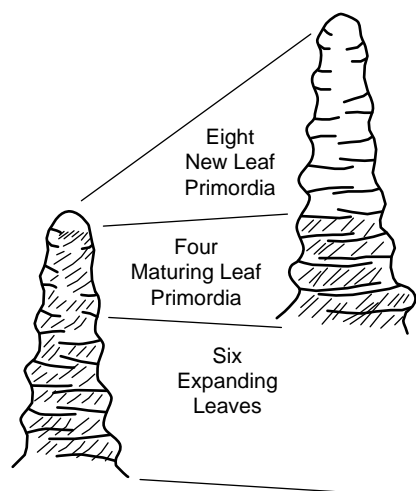

**Fig. 3.** Growth of cultured *L. temulentum* apices. Apices were cultured onto kinetin medium 34-36 hours after the beginning of the long day and subcultured at 10 and 20 days onto fresh kinetin medium. Apices from the same population of plants were dissected to establish the number of leaf primordia on an apex at the time of culturing. On average, the apices that remained vegetative had ten leaf primordia when cultured, expanded six of these primordia and initiated eight new leaf primordia during the 30 day culture period. The clear area denotes the shoot apical meristem in the left-hand diagram and the lineage of that shoot apical meristem in the right-hand diagram after 30 days in culture. Experiment no. 98.

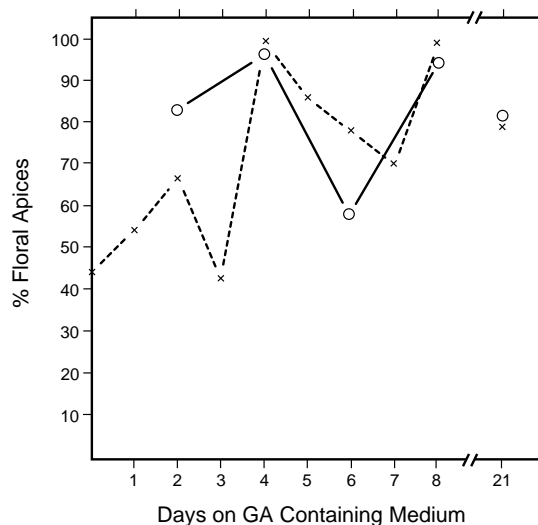

**Fig. 4.** Percentage of *L. temulentum* apices explanted from long-day induced plants that flowered in culture as a function of the number of days cultured on GA<sub>3</sub> medium. All apices explanted 34-36 hours after the beginning of the long day. Apices cultured on GA<sub>3</sub> medium and then transferred to kinetin medium for a total culture time of 21 days: x—x; 18 apices per time point, 80% of apices on GA<sub>3</sub> medium for 21 days flowered, experiment no. 101. Apices cultured on kinetin medium for 20 days, onto GA<sub>3</sub> medium, and then onto kinetin medium for a grand total of 40 days in culture: O—O; 24 apices per time point, 14% of the apices on kinetin medium for 20 days flowered, 80% of the apices on GA<sub>3</sub> medium for 21 days flowered, experiment no. 100.

### Ancymidol inhibition of flowering

Plants were treated with ancymidol and cultured on media with, and without, ancymidol 48-52 hours after the beginning of the inductive LD. All of the kinetin and GA<sub>3</sub> control apices flowered as expected (Fig. 5). Ancymidol treatment reduced flowering to below 50% at the terminal position and to under 25% for lateral positions for those apices cultured on kinetin-ancymidol medium. In contrast, all apices cultured on GA<sub>3</sub>-ancymidol medium flowered, forming spikelets at terminal and lateral positions. Apices transferred from kinetin-ancymidol medium after 30 days onto GA<sub>3</sub>-ancymidol medium all formed terminal spikelets, and over 90% of the apices formed lateral spikelets. In contrast, just over 60% of the apices transferred to kinetin-ancymidol medium formed terminal spikelets and just under 40% formed lateral spikelets.

### Inflorescence development following GA<sub>3</sub> leaf application

Floral initiation in response to applied GA led to morphological patterns different, in vivo and in vitro, from those observed after a single LD. For intact plants, Evans (1969b) reported inflorescences had an inverse gradient with the lowest spikelets being more advanced than the upper spikelets. He noted that sometimes the terminal spikelet was absent with the terminal meristem appearing vegetative. We observed these patterns as well as double gradients and empty places in an inflorescence where spikelets should have been. Apices explanted from SD grown plants treated with GA<sub>3</sub> initiated inflorescences in culture that had the following patterns: a basepetal gradient of

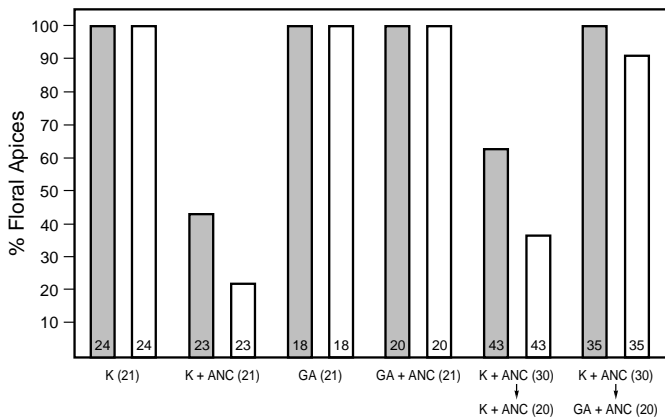

**Fig. 5.** Percentage of *L. temulentum* apices explanted from long-day induced plants that flowered, as a function of culture medium and treatment with ancymidol. All apices explanted 48-52 hours after the beginning of the inductive long day. K, kinetin medium; K+ANC, kinetin-ancymidol medium; GA, GA<sub>3</sub> medium; GA+ANC, GA<sub>3</sub>-ancymidol medium. Numbers in parentheses are the number of days on the medium before being dissected or final transfer. Apices on K+ANC for 30 days were transferred to fresh K+ANC medium at 10 and 20 days. Arrow denotes final transfer. Shaded histogram bars are for terminal meristems and clear bars are for lateral meristems. Numbers in the histogram bars indicated the number of surviving apices. Experiment no. 148.

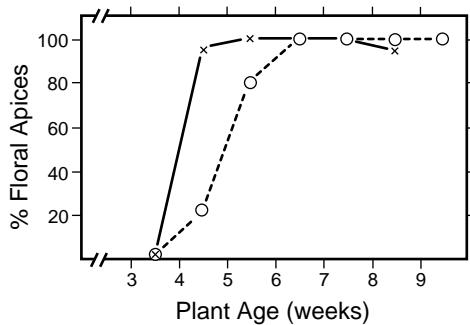

**Fig. 6.** Percentage *L. temulentum* plants that flowered as a function of plant age and long-day induction or leaf-applied GA<sub>3</sub>. Plants given one inductive long day and dissected 21 days later: x—x, 10 plants per age. Plants treated with GA<sub>3</sub> and dissected 21 days later: o—o, 10 plants per age. Plants from many populations induced, or treated with GA<sub>3</sub>, at same time.

floral scores, the basal half of the apex vegetative, a complex pattern of floral scores down the main axis, and only a terminal spikelet.

**Floral initiation following GA<sub>3</sub> leaf application**

Intact plants acquired the capacity to initiate inflorescence development in response to one LD, or a single application of 50 µg of GA<sub>3</sub> to a leaf, over a several week period (Fig. 6) although younger plants will flower if given more LDs (Evans, 1960a). The capacity to respond to one LD occurred sooner, and faster, than the capacity to respond to leaf applied GA<sub>3</sub>. In intact 8-week-old plants, one LD caused a faster initiation, and more complete spikelet development, than a single dose of GA<sub>3</sub> (Fig. 7).

Various patterns of leaf removal after GA<sub>3</sub> application estab-

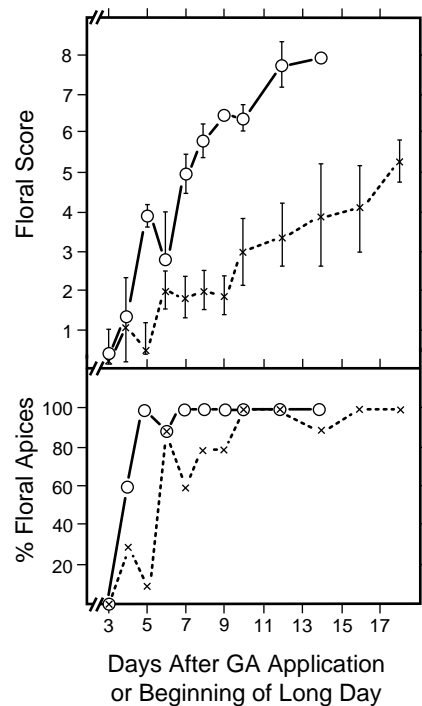

**Fig. 7.** Floral score and percentage of *L. temulentum* plants that flowered as a function of time after one inductive long day or leaf application of GA<sub>3</sub>. Plants given 1 inductive long day and apices dissected on the day indicated: o—o, 10 plants per day. Plants treated with GA<sub>3</sub> and apices dissected on the day indicated: x—x, 10 plants per day. Floral score is for all apices at time point. Error bars are standard deviations. Experiment no. 149.

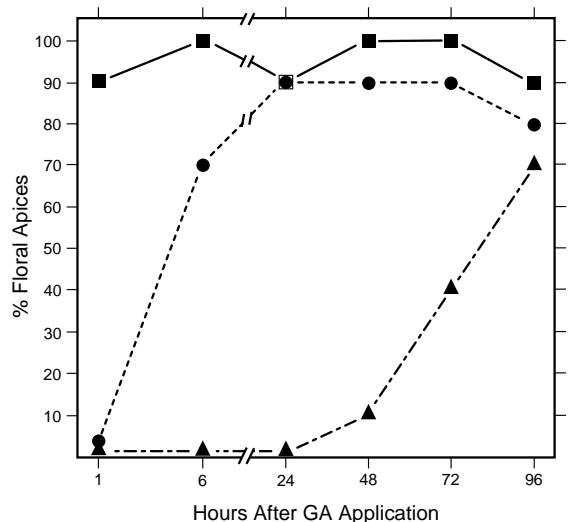

**Fig. 8.** Percentage GA<sub>3</sub>- but not LD-treated *L. temulentum* plants that flowered as a function of when the various leaves were removed. All but the leaf to which GA<sub>3</sub> was applied were removed: ■—■. Only the leaf to which GA<sub>3</sub> was applied removed: ●—●. All leaves removed: ▲—▲. Ten plants per time point. Experiment no. 152.

lished three things (Fig. 8). First, removal of all but the leaf to which GA<sub>3</sub> was applied established that only the leaf to which GA<sub>3</sub> was applied was required to get 100% flowering response.

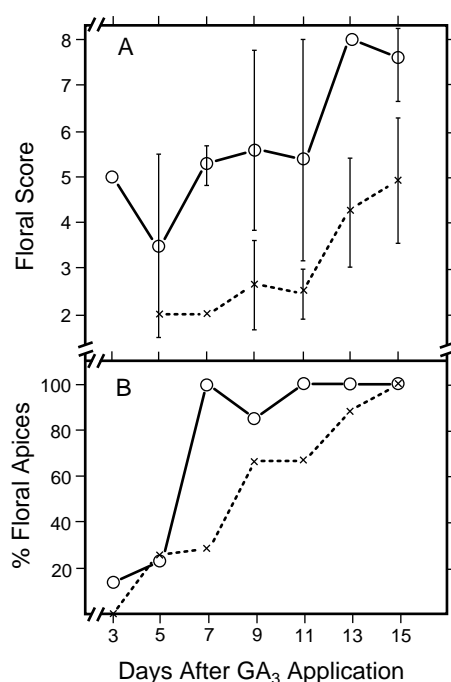

**Fig. 9.** Floral score and percentage of apices that became floral in explants from GA<sub>3</sub>-treated plants as a function of explant time and culture medium. Apices explanted onto GA<sub>3</sub> medium: ○—○. Apices explanted onto kinetin medium: ×—×. Eighteen apices per time point. Floral score is for all apices at a time point. Error bars are standard deviations. Experiment no. 164.

Second, removal of the leaf to which GA<sub>3</sub> was applied indicated that the GA<sub>3</sub> leaf was required for about 1 day in order to get 90% flowering. Third, removal of all leaves demonstrated that at least some leaf blade was required for 4 days to get 70% flowering.

When apices are cultured at various times after the application of GA<sub>3</sub>, apices placed on GA<sub>3</sub> medium expressed the capacity to initiate floral morphogenesis several days sooner, and ultimately reach a more advanced stage of floral morphogenesis, than apices cultured on kinetin medium (Fig. 9).

## DISCUSSION

Although it has been known for a long time that GAs cause some plant species to flower, it has been unclear in most cases, how or if, the exogenous hormone intervenes in evocation, floral initiation, and floral morphogenesis (Evans, 1964, 1969b; Lang, 1965; Zeevaart, 1983; King et al., 1993). Our analysis of the role of GA<sub>3</sub> in flowering of *L. temulentum*, strain Ceres, has provided evidence that GAs play separate, and distinct, roles in the apex and in the leaves. In the case of photoperiodically controlled floral initiation, the inductive photoperiod leads to the activation of two signals. The first signal, from the leaves, causes the shoot apex to acquire the capacity to respond to GA. This first signal is, within hours, followed by an endogenous increase of GAs at the apex (Pharis et al., 1987) which elicits floral morphogenesis. That is, the first signal evokes the apex into a florally determined state and the second signal, GA, acts uniquely on the various cells/tissues of the

apex to elicit the expression of the determined state thereby forming an inflorescence. Leaf-applied GA<sub>3</sub> appears to act on the leaf, very much like the LD photoperiod, causing processes in the leaves that result in a signal being sent to the apex which determines the shoot apex for floral morphogenesis. This determined apex subsequently initiates floral morphogenesis perhaps in response to endogenous GAs.

### Gibberellins at the apex elicit floral morphogenesis

Our earlier study established that most *Lolium* apices became florally determined on the day after the LD (i.e., Day II) so long as they were cultured in the presence of GA (McDaniel et al., 1991). It also established that floral determination in a population of plants occurred over a period of about 12 hours, usually beginning sometime early in Day II. In an earlier study, Pharis et al. (1987) established that during Day II a transient burst of GAs could be detected in *Lolium* apices. We hypothesized that most apices excised on Day II had been acted upon by a photoperiodically induced leaf signal but not by GA. This hypothesis is supported by the observation that apices excised onto kinetin medium just after the end of the light period of Day II grew vegetatively for many days, but when exposed to GA<sub>3</sub>, they initiated floral morphogenesis (Fig. 2). The transient requirement for GA is supported by the observation that excised apices only needed to be exposed to GA<sub>3</sub> in the medium for several days to elicit floral initiation (Fig. 4). The strongest evidence for GAs eliciting the expression of floral morphogenesis from a florally determined apex came from treating plants, and culturing apices, with ancymidol which inhibits the oxidation of *ent*-kaurene to *ent*-kaurenoic acid, thereby reducing GA synthesis (Sponsel, 1987). Ancymidol treatment substantially reduced floral initiation in apices cultured in the absence of GA<sub>3</sub>. If GA<sub>3</sub> was in the medium, ancymidol had no influence on floral initiation (Fig. 5). Our interpretation of ancymidol inhibition of floral initiation is simple and logical. Alternatively, in light of the varied responses to GA synthesis inhibitors administered around the time of evocation (Lang, 1965; Evans, 1969a,b; Zeevaart, 1983; Pharis and King, 1985), it is possible that ancymidol may be acting in other ways that blocking floral initiation. It is then, however, more difficult to explain why GA<sub>3</sub> totally overrides the ancymidol inhibition of floral initiation.

In a detailed analysis of in vitro flowering of *L. temulentum* apices King et al. (1993) proposed three explanations for the relationship between the LD stimulus and the GAs: "1. that the LD stimulus in *L. temulentum* is GA; 2. that the LD stimulus translocated from the leaves to the shoot apex consists of two components, a 'floral stimulus' and a florigenic GA; 3. that GAs are not a component of the LD stimulus but interact synergistically with it to enhance the flowering response." They did not favor the first hypothesis, nor do we think it is just GA. Our data provide strong evidence for the second hypothesis if one assumes that the transient burst of GAs reported by Pharis et al. (1987) comes from the leaves. They favored the third hypothesis because their experiments tended to concentrate on floral morphogenesis and their results indicated GAs played an important role in floral morphogenesis but not in evocation.

The recent study of King et al. (1993) also reported that when apices were explanted from plants grown in short days for 8 weeks in high irradiance, they would initiate floral morphogenesis on medium lacking GA, while apices from younger

plants required not only GA in the medium but also a LD prior to explanting in order to flower. Their results establish that, although apices on 8-week plants would have grown vegetatively for a number of weeks in vivo, they were florally determined and expressed this state when removed from the plant. That is, *L. temulentum* eventually flowers under short days with time to flowering being positively correlated with increasing irradiance (Evans and King, 1985). For example, under our short-day growth room conditions *Lolium* plants initiate floral morphogenesis between 4 and 5 months of age. The activation order of the processes that are responsible for flowering in short days is not known, whereas LD activation order has been characterized in earlier studies (Evans and King, 1985; McDaniel et al., 1991) and in more detail above (i.e., LD acts on competent leaves, LD leaf signal reaches apex, apex evoked, GA level rises in apex, and florally determined state expressed). The King et al. (1993) result indicates that flowering of *Lolium* in short days is prevented in vivo by more than a lack of the two signals that cause flowering after photoperiodic induction. Perhaps the inhibitor reported by Evans (1960b) might be responsible. Their result is not unique as expression of the florally determined state in sunflower and *Bougainvillea* apices is inhibited in vivo but expressed in vitro (Habermann and Sekulow, 1972; Steffen et al., 1988a,b; see McDaniel et al., 1992 for a discussion).

### Floral initiation by leaf applied GA<sub>3</sub>

The simplest explanation would be that leaf applied GA is simply translocated to the apex where it evokes floral morphogenesis. Evans has not favored this explanation for many reasons (Evans, 1969b; King et al., 1993). Our data also are not consistent with this explanation. First, in intact plants, although LD and GA<sub>3</sub> sensitivities increase with plant age, the LD response saturates sooner, and more quickly, than the GA<sub>3</sub> sensitivity (Fig. 6). Second, under our growth conditions, although 7- to 8-week-old plants are fully responsive to leaf applied GA<sub>3</sub>, excised apices are incapable of responding to GA<sub>3</sub> unless they have been acted upon by the photoperiodically induced leaf signal. Third, all of the leaves must remain on the plant for about 4 days to obtain a high percentage flowering, while the GA<sub>3</sub>-treated leaf needs only to be attached for about one day for the same response. Since just the GA<sub>3</sub> leaf alone can give the same response when all other leaves are removed 1 hour after GA<sub>3</sub> application, and since LD induced plants require no leaves after the LD for all to flower (Evans and King, 1985; McDaniel et al., 1991), nutrition is probably not at issue. Although a novel suggestion, these leaf-removal results may indicate that the leaves are in communication with each other and that the leaf to which GA<sub>3</sub> is applied communicates first with other leaves and subsequently all leaves send a signal to the apex. Fourth, apices excised from GA<sub>3</sub>-treated plants show a time dependent flowering response to GA<sub>3</sub> in the culture medium as do apices from plants exposed to one LD (Fig. 9). It would appear that the apex of GA<sub>3</sub>-treated plants is undergoing a two step process. First, in response to the leaf applied GA, a leaf signal induces the apex into a florally determined state and then, endogenous GAs elicit floral morphogenesis.

### The role of gibberellins in flowering

In *Bryophyllum daigremontianum*, a long-short-day plant, exogenous GA<sub>3</sub> applied to plants in short-days causes the

leaves to send a floral stimulus to the apex (Zeevaart, 1969). LDs appear to enable the leaves to produce endogenous GA that in short days causes the floral stimulus to be produced (Zeevaart and Lang, 1962, 1963). *Lolium* leaves appear to respond to exogenous GA<sub>3</sub> in a manner similar to the response reported for *Bryophyllum* leaves. Analysis of several GA mutants in *Arabidopsis thaliana* have established that GAs are involved in flower initiation (Wilson et al., 1992). The responses characterized, however, were too complex to establish the exact role played by GA. The varied responses of different species of angiosperms to exogenous GA (Lang, 1965; Evans, 1969b; Zeevaart, 1983; Pharis and King, 1985) are consistent with the interpretation that floral initiation is regulated by controlling different signals, and processes, in different species (McDaniel, 1984; McDaniel et al., 1992). Thus, GAs may play a particular regulatory role in one species but not in another. This interpretation of the flowering literature indicates that a species, or genotype, must be physiologically, and developmentally, characterized before its regulatory control can be placed in some mechanistically meaningful category. For example, the classic flowering types (e.g. long-day, short-day, day neutral) do not necessarily categorize plants as to mechanism of floral initiation control. As we have discussed, the developmental processes involved in floral initiation may be common to all angiosperms and categorization of flowering types as a function of the developmental mechanism(s) employed to regulate floral initiation may be relatively simple and informative (McDaniel, 1992, 1996).

C. N. M. would like to dedicate this paper to Anton Lang who championed the floral stimulus concept and whose unparalleled editorial efforts, talents, and skills challenged all of us to be better writers. Thank you Anton! We thank Lloyd Evans and Rod King for introducing C. N. M. to *Lolium*, Sean Devine for preliminary studies on GA<sub>3</sub>-stimulated flowering and the data in Fig. 6, Lloyd Evans and Harry Roy for critical evaluation of the manuscript. Support was provided by NSF grant DCB-9003739 and USDA grant 93-37304-9440.

## REFERENCES

- Evans, L. T. (1960a). Inflorescence initiation in *Lolium temulentum* L. I. Effect of plant age and leaf area on sensitivity to photoperiodic induction. *Aust. J. Biol. Sci.* **13**, 123-131.
- Evans, L. T. (1960b). Inflorescence initiation in *Lolium temulentum* L. II. Evidence for inhibitory and promotive photoperiodic processes involving transmissible products. *Aust. J. Biol. Sci.* **13**, 429-440.
- Evans, L. T. (1964). Inflorescence initiation in *Lolium temulentum* L. V. The role of auxins and gibberellins. *Aust. J. Biol. Sci.* **17**, 10-23.
- Evans, L. T. (1969a). *Lolium temulentum*. In *The Induction of Flowering* (ed. L. T. Evans), pp. 328-349. South Melbourne: Macmillan.
- Evans, L. T. (1969b). Inflorescence initiation in *Lolium temulentum* L. XIII. The role of gibberellins. *Aust. J. Biol. Sci.* **22**, 773-786.
- Evans, L. T. and King, R. W. (1985). *Lolium temulentum*. In *CRC Handbook of Flowering* (ed. A. H. Halevy), pp. 306-321. Florida: CRC Press.
- Evans, L. T., King, R. W., Chu, A., Mander, L. N. and Pharis, R. P. (1990). Gibberellin structure and florigenic activity in *Lolium temulentum*, a long-day plant. *Planta* **182**, 97-106.
- Evans, L. T., King, R. W., Mander, L. N. and Pharis, R. P. (1994). The relative significance for stem elongation and flowering in *Lolium temulentum* of 3 $\beta$ -hydroxylation of gibberellins. *Planta* **192**, 130-136.
- Habermann, H. M. and Sekulow, D. B. (1972). Development and aging in *Helianthus annuus* L.: Effects of the biological milieu of the apical meristem on patterns of development. *Growth* **36**, 339-349.
- Jones, M. G. and Zeevaart, J. A. D. (1980). The effect of photoperiod on the

- levels of seven endogenous gibberellins in the long day plant *Agrostemma githago* L. *Planta* **149**, 24-279.
- King, R. W., Blundell, C. and Evans, L. T.** (1993). The behaviour of shoot apices of *Lolium temulentum* in vitro as the basis of an assay system for florigenic extracts. *Aust. J. Plant Physiol.* **20**, 337-348.
- Lang, A.** (1957). The effect of gibberellin upon flower formation. *Proc. Nat. Acad. Sci. USA* **43**, 709-717.
- Lang, A.** (1965). Physiology of flower induction. In *Encyclopedia of Plant Physiology* (ed. W. Ruhland), pp. 1380-1536. Berlin: Springer-Verlag.
- Linsmaier, E. M. and Skoog, F.** (1965). Organic growth factor requirements of tobacco tissue cultures. *Physiol. Plant.* **18**, 100-127.
- McDaniel, C. N.** (1984). Shoot meristem development: In *Positional Controls in Plant Development* (eds. P. Barlow and D.J. Carr), pp. 319-47. Cambridge: Cambridge University Press.
- McDaniel, C. N.** (1992). Determination to flower in *Nicotiana*. In *Current Topics in Developmental Biology* (ed. R. Pederson), pp. 1-37. Academic Press.
- McDaniel, C. N.** (1996). Developmental physiology of floral initiation in *Nicotiana tabacum* L. *J. Exp. Bot.* **47**, 465-475.
- McDaniel, C. N., King, R. W. and Evans, L. T.** (1991). Floral determination and in-vitro floral differentiation in isolated shoot apices of *Lolium temulentum* L. *Planta* **185**, 9-16.
- McDaniel, C. N., Singer, S. R. and Smith, S. M. E.** (1992). Developmental states associated with the floral transition. *Dev. Biol.* **153**, 59-69.
- Metzger, J. D. and Zeevaart, J. A. D.** (1980). Effect of photoperiod on the levels of endogenous gibberellins in spinach as measured by combined gas chromatography-selected ion current monitoring. *Plant Physiol.* **66**, 844-846.
- Pharis, R. P. and King, R. W.** (1985). Gibberellins and reproductive development in seed plants. *Ann. Rev. Plant Physiol.* **36**, 517-568.
- Pharis, R. P., Evans, L. T., King, R. W. and Mander, L. N.** (1987). Gibberellins, endogenous and applied, in relation to flower induction in the long-day plant *Lolium temulentum*. *Plant Physiol.* **84**, 1132-1138.
- Slack, F. M. V.** (1983). *From Egg to Embryo: Determination Events in Early Development*. Cambridge: Cambridge University Press
- Sponsel, V. M.** (1987). Gibberellin biosynthesis and metabolism. In *Plant Hormones and their Role in Plant Growth and Development* (ed. P. J. Davies), pp. 296-317. Boston: Martinus Nijhoff.
- Steffen, J. D., Sachs, R. M. and Hackett, W. P.** (1988a). Growth development of reproductive and vegetative tissues of *Bougainvillea* cultured in vitro as a function of carbohydrate. *Amer. J. Bot.* **75**, 1219-1224.
- Steffen, J. D., Sachs, R. M. and Hackett, W. P.** (1988b). *Bougainvillea* inflorescence meristem development: Comparative action of GA<sub>3</sub> in vivo and in vitro. *Amer. J. Bot.* **75**, 1225-1227.
- Wilson, R. N., Heckman, J. W. and Somerville, C. R.** (1992). Gibberellin is required for flowering in *Arabidopsis thaliana* under short days. *Plant Physiol.* **100**, 403-408.
- Zeevaart, J. A. D. and Lang, A.** (1962). The relationship between gibberellin and floral stimulus in *Bryophyllum daigremontianum*. *Planta* **58**, 531-542.
- Zeevaart, J. A. D. and Lang, A.** (1963). Suppression of floral induction in *Bryophyllum daigremontianum* by a growth retardant. *Planta* **59**, 509-517.
- Zeevaart, J. A. D.** (1969). The leaf as the site of gibberellin action in flower formation in *Bryophyllum daigremontianum*. *Planta* **84**, 339-347.
- Zeevaart, J. A. D.** (1983). Gibberellins and flowering. In *The Biochemistry and Physiology of Gibberellins* (ed. A. Crozier), pp. 333-374. New York: Praeger.

(Accepted 19 July 1996)
